# Supplementary material
Source: publisher figshare collection journal article supplement (https://frontiersin.figshare.com/ndownloader/files/23544215)
Supplement: Supplementary file 1 [file 23544215]

**Table S1**

Precipitation (mm) during the experimental period

|  | 2016 | 2017 | 2018 |
| --- | --- | --- | --- |
| Jan | -- | 2.1 | 1.8 |
| Feb | -- | 2.8 | 0.2 |
| Mar | -- | 0.9 | 0.4 |
| Apr | 0.9 | 0.6 | 1.4 |
| May | 10.8 | 9.4 | 12.8 |
| Jun | 5.7 | 16.5 | 23.0 |
| July | 39.9 | 3.9 | 37.1 |
| Agu | 32.1 | 20.0 | 4.6 |
| Sep | 4.3 | 21.3 | 5.2 |
| Oct | 0 | 1.2 | 2.6 |
| Nov | 1.3 | 1.3 | 3.0 |
| Dec | 0.3 | 1.4 | 1.6 |

The data were provided by the standard weather station in the experimental field.
